# Supplementary material for: External condition-induced interfacial charge transfer in single-walled carbon nanotube/graphene van der Waals heterostructures
Source: Royal Society of Chemistry journal article supplement (doi:10.1039/d3tc03455k), 2023-01-01
Supplement: d3tc03455k2.pdf [file d3tc03455k2.pdf]

## Supporting Information

### External Condition-induced Interfacial Charge Transfer in the Single-Walled Carbon Nanotube/Graphene van der Waals Heterostructures

Huan Yin, Ruxuan Zhang, Tian Tian, Zhi Yang, Nantao Hu, Yafei Zhang, and Yanjie  
Su<sup>\*a</sup>

Key Laboratory of Thin Film and Microfabrication (Ministry of Education),  
Department of Micro/Nano Electronics, School of Electronics, Information and  
Electrical Engineering, Shanghai Jiao Tong University, Shanghai 200240, PR  
China,

Corresponding author: Yanjie Su, Email: [yanjiesu@sjtu.edu.cn](mailto:yanjiesu@sjtu.edu.cn)

#### Contents

**Figure S1** The histograms of a)  $2D^+/G$  intensity ratio and b)  $2D^+$  band FWHM in SWCNT/graphene vdW heterostructures, and pure graphene. The  $2D^+$  FWHM and the  $2D^+/G$  intensity ratio of SWCNT/graphene vdW heterostructures were decreased compared to graphene.

**Figure S2** 2D band of pure graphene as tend of different relative humidity.

**Table S1** Trends in the 2D band changes of SWCNT/graphene heterostructures and charge transfer at the interfaces under different external conditions

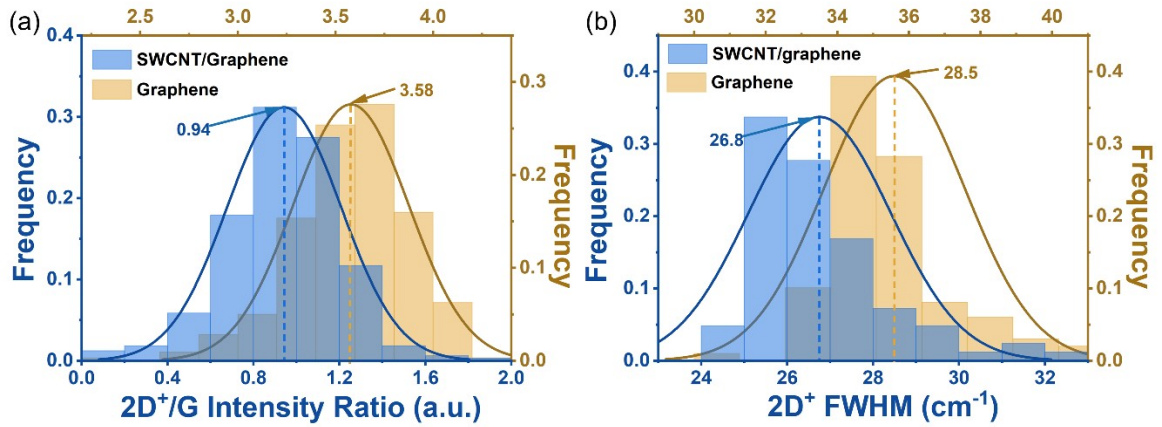

**Figure S1** The histograms of a) 2D<sup>+</sup>/G intensity ratio and b) 2D<sup>+</sup> band FWHM in SWCNT/graphene vdW heterostructures, and pure graphene. The 2D<sup>+</sup> FWHM and the 2D<sup>+</sup>/G intensity ratio of SWCNT/graphene vdW heterostructures were decreased compared to graphene.

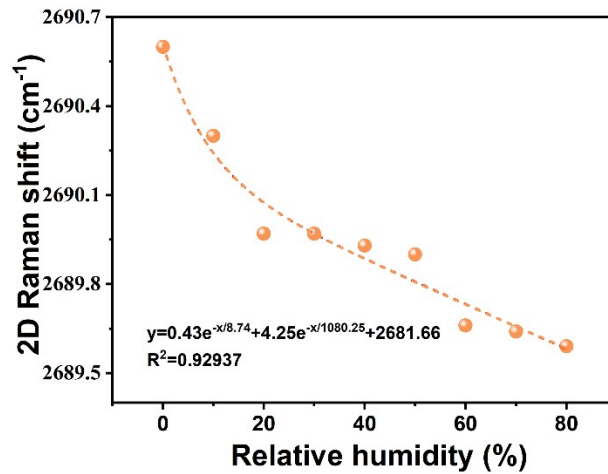

**Figure S2** 2D band of pure graphene as tend of different relative humidity. The curve fitted by  $y = 0.43e^{-x/8.74} + 4.25e^{-x/1080.25} + 2681.66$ , where y corresponds to the 2D<sup>+</sup>/G intensity ratio, x is the relative humidity. The R<sup>2</sup> values obtained by fitting is greater than 0.98, indicating that the fitting line agreed with the present data in figure.

Table S1 Trends in the 2D band changes of SWCNT/graphene heterostructures and charge transfer at the interfaces under different external conditions

| External condition                           | 2D <sup>-</sup>                    | 2D <sup>+</sup> | Charge transfer at different interfaces |                            |                  |
|----------------------------------------------|------------------------------------|-----------------|-----------------------------------------|----------------------------|------------------|
|                                              | Raman shift                        | Raman shift     |                                         |                            |                  |
| Voltage<br>(-10 V~10 V)                      | Redshift<br>(-4V as neutral point) | Redshift        | /                                       | /                          | SWCNTs →Graphene |
| Humidity<br>(0~80% RH)                       | Redshift                           | Redshift        | H <sub>2</sub> O → SWCNTs               | H <sub>2</sub> O →Graphene | SWCNTs →Graphene |
| NO <sub>2</sub><br>atmosphere<br>(0~500 ppm) | Redshift                           | Blueshift       | NO <sub>2</sub> →SWCNTs                 | Graphene→NO <sub>2</sub>   | SWCNTs →Graphene |
| Temperature<br>(295 ~ 473 k)                 | Redshift                           | Redshift        | /                                       | /                          | SWCNTs →Graphene |
